# Supplementary material for: Disease-associated KIF3A variants alter gene methylation and expression impacting skin barrier and atopic dermatitis risk
Source: PubMed Central journal article supplement (PMC7427989; doi:10.1038/s41467-020-17895-x), 2020-08-14
Supplement: 41467_2020_17895_MOESM1_ESM.pdf [file 41467_2020_17895_MOESM1_ESM.pdf]

## **Supplementary Information**

**Disease-associated *KIF3A* variants alter gene methylation and expression impacting skin barrier and atopic dermatitis risk**

**Stevens et al.**

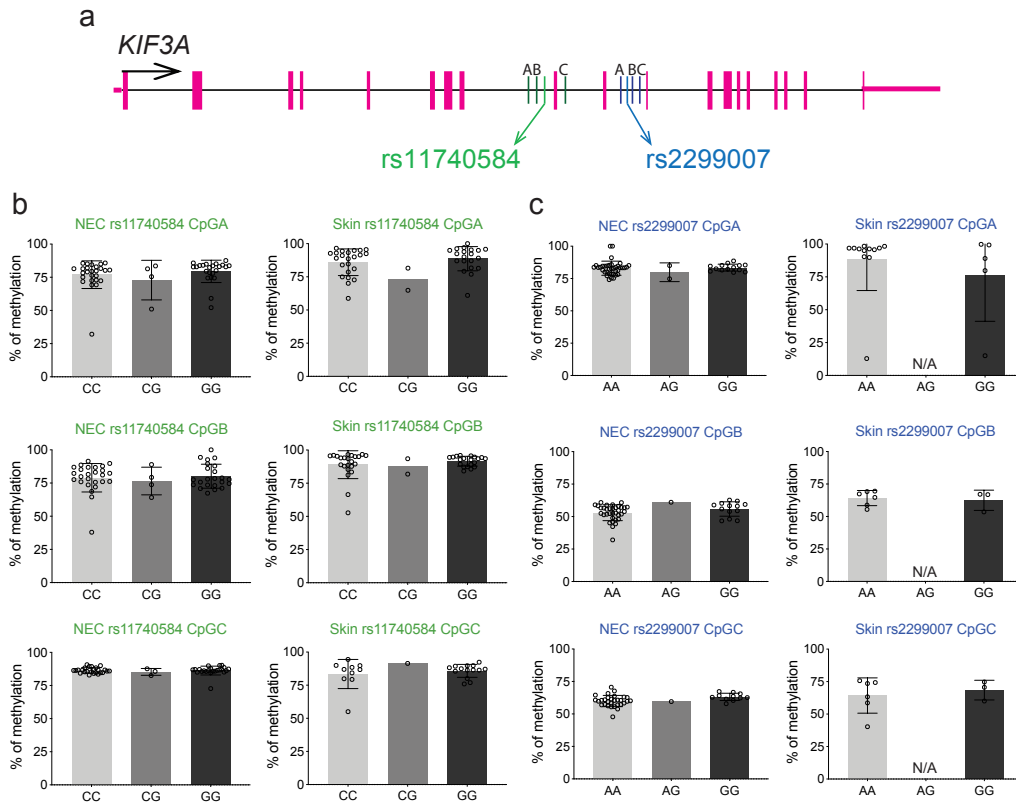

**Supplementary Figure 1. Methylation levels of CpGs neighboring *KIF3A* SNPs rs11740584 and rs2299007 are not altered by rs11740584 and rs2299007 genotype.** **a**, Genomic organization of the human *KIF3A* SNPs rs11740584 and rs2299007 and neighboring CpGs. Magenta bars indicate exons. **b-c**, Skin cell (isolated from skin tapes) and nasal epithelial cell methylation levels at rs11740584 and rs2299007 neighboring CpG sites in homozygous and heterozygous alternate allele carriers. Each chart includes biologically independent samples examined over 2 independent experiments (NEC rs11740584 CpGA n=53, CpGB n=53, CpGC n=51; Skin rs11740584 CpGA n=45, CpGB n=45, CpGC n=25; NEC rs2299007 CpGA n=53, CpGB n=48, CpGC n=42; Skin rs2299007 CpGA n=17, CpGB n=9 and CpGC n=9). A one-way ANOVA was conducted to compare effects of genotype on methylation levels. No statistical significance was observed. Data in all panels are presented as mean values +/- SD. NEC = Nasal epithelial cells. Source data are provided as a Source Data file.

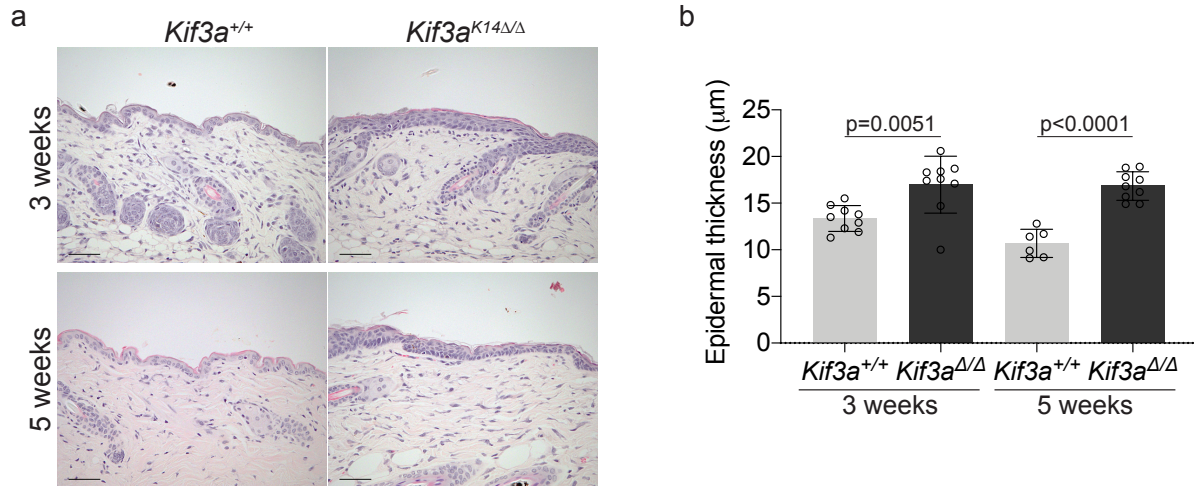

**Supplementary Figure 2. *Kif3a*<sup>K14Δ/Δ</sup> mice have increased epidermal thickness. a,** Representative H&E staining of *Kif3a*<sup>+/+</sup> and *Kif3a*<sup>K14Δ/Δ</sup> mice at 3 and 5 weeks of age. **b,** Epidermal thickness quantification of mice at 3 and 8 weeks of age (n=18 and n=15 biologically independent animals examined over 2 independent experiments). Scale bar: 50μm. Two-sided T test was conducted to compare effects of genotype on epidermal thickness. Data is presented as mean values +/- SD. Source data are provided as a Source Data file.

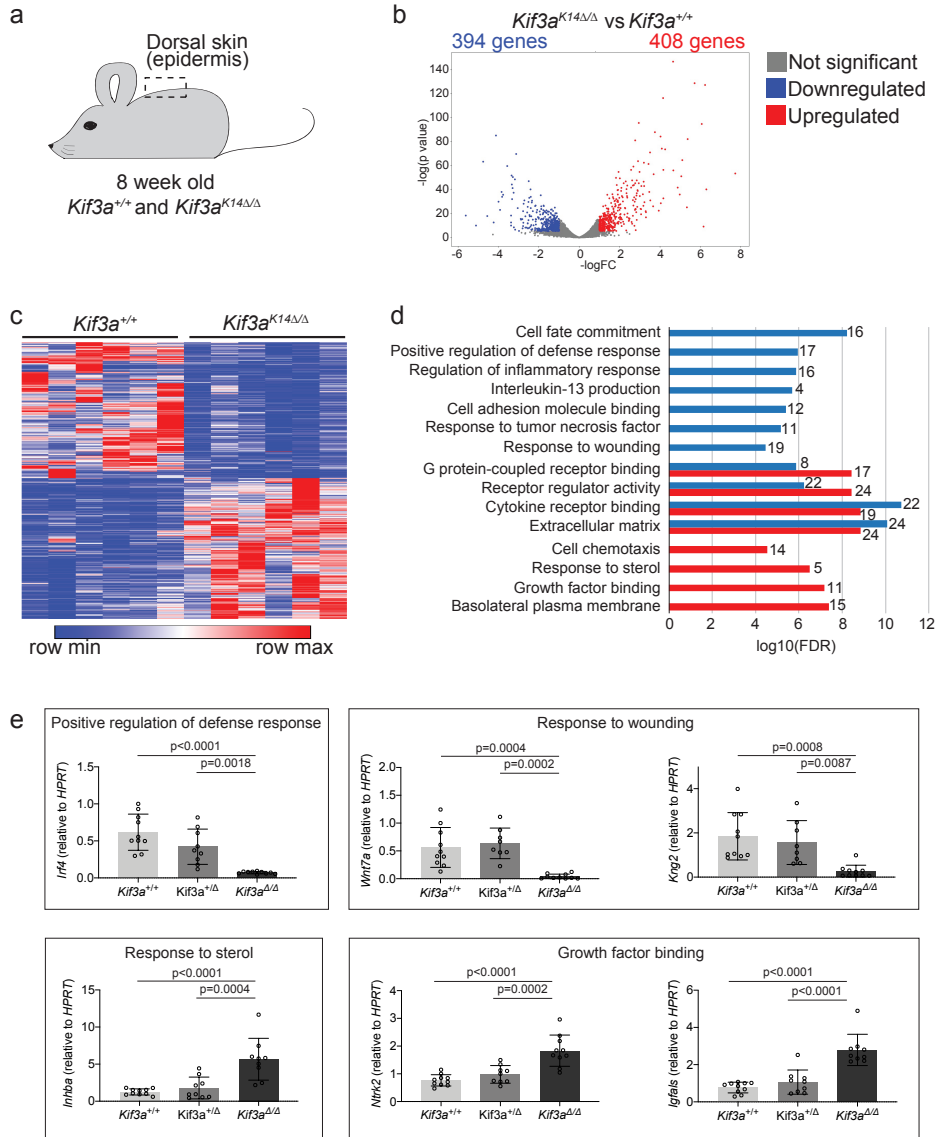

**Supplementary Figure 3. Unbiased skin transcriptome analysis of *Kif3a<sup>K14Δ/Δ</sup>* mice. a,** Experimental design of the RNA-seq analysis (n=12 biologically independent animals). **b,** Volcano plot of log fold change in expression between *Kif3a<sup>K14Δ/Δ</sup>* versus *Kif3a<sup>+/+</sup>*. Upregulated genes in red and downregulated genes in blue, based on log<sub>2</sub> fold change (FC)  $\leq -1$  or  $\geq 1$  and false discovery rate (FDR)  $\leq 5\%$ . **c,** Heatmap showing all differentially expressed genes. **d,** GO term enrichment analysis of upregulated (red) and downregulated (blue) genes. **e,** qPCR validation of *Kif3a* regulated genes in *Kif3a<sup>+/+</sup>*, *Kif3a<sup>+/Δ</sup>* and *Kif3a<sup>K14Δ/Δ</sup>* 8 week old animals (n=29 biologically

independent animals per panel, examined over 1 experiment). A one-way ANOVA was conducted to compare effects of genotype on gene expression. Data in all panels are presented as mean values  $\pm$  SD. Source data are provided as a Source Data file.

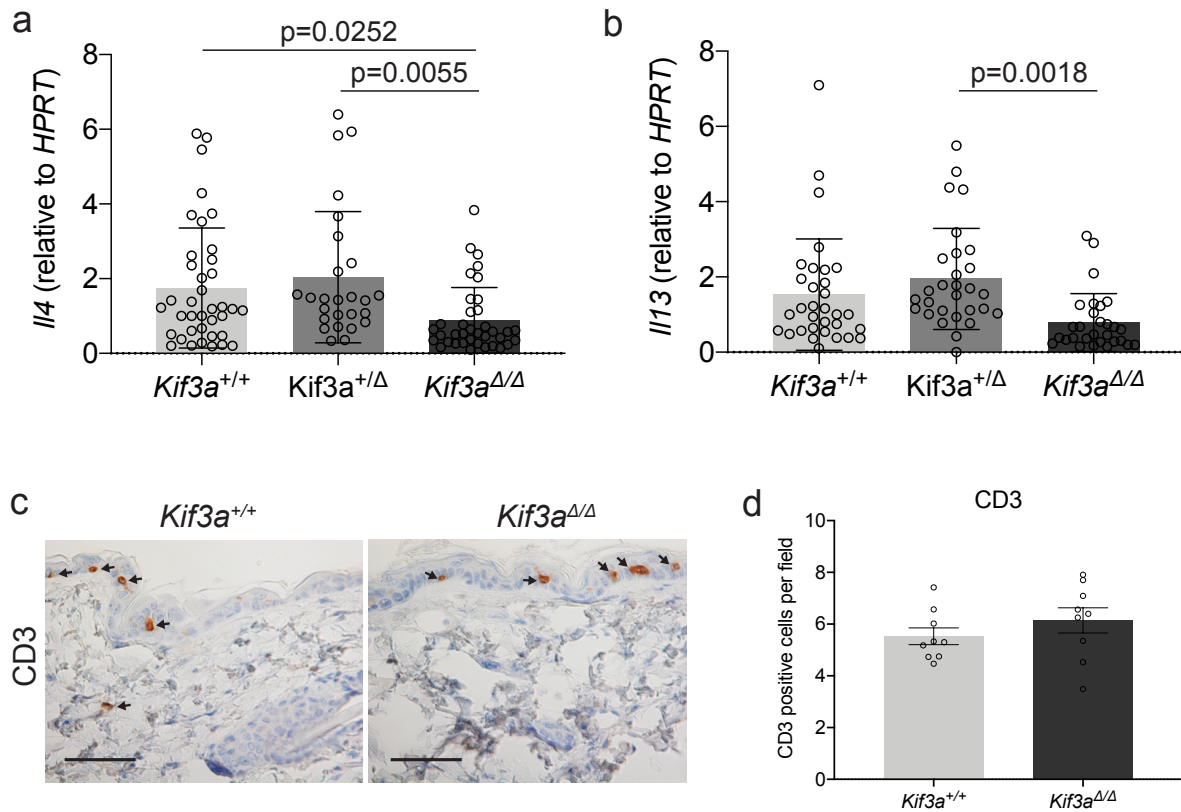

**Supplementary Figure 4. *Kif3a*<sup>K14Δ/Δ</sup> mice do not have increased inflammation at baseline.**

**a-b**, RNA isolated from *Kif3a*<sup>+/+</sup>, *Kif3a*<sup>Δ/+</sup>, and *Kif3a*<sup>K14Δ/Δ</sup> epidermis was assessed for mRNA levels of *IL4* and *IL13*. Values are expressed as fold change over *Kif3a*<sup>+/+</sup> and relative to *Hprt*

(*IL4* n=101 and *IL13* n=90 biologically independent animals examined over 4 independent

experiments). **c-d**, Skin sections from 8 week old *Kif3a*<sup>+/+</sup> and *Kif3a*<sup>K14Δ/Δ</sup> mice were

immunostained using anti-CD3 and quantified (n=18 biologically independent animals

examined over 1 experiment). Scale bars, 50μm. A one-way ANOVA was conducted to compare

effects of genotype on gene expression and CD3 positive cell count. Data in all panels are

presented as mean values +/- SD. Source data are provided as a Source Data file.

**Supplementary Table 1.** Transcription factors whose binding sites are potentially altered by *KIF3A* SNPs. Table shows transcription factors that bind preferentially in the presence of rs11740584 or rs2299007 risk alleles.

| rs11740584 risk allele | rs2299007 risk allele |
|------------------------|-----------------------|
| ZSCAN26                | ARNT2                 |
|                        | ARNT                  |
|                        | ARNTL                 |
|                        | BHLHE40               |
|                        | BHLHE41               |
|                        | CLOCK                 |
|                        | FIGLA                 |
|                        | HES1                  |
|                        | HES2                  |
|                        | HES5                  |
|                        | HES7                  |
|                        | HEY2                  |
|                        | ID1                   |
|                        | ID2                   |
|                        | ID3                   |
|                        | ID4                   |
|                        | MAX                   |
|                        | MITF                  |
|                        | MLX                   |
|                        | MLXIP                 |
|                        | MNT                   |
|                        | MYC                   |
|                        | MYCL                  |
|                        | MYCN                  |
|                        | MYOD1                 |
|                        | SOHLH2                |
|                        | SREBF1                |
|                        | SREBF2                |
|                        | TCF12                 |
|                        | TCF3                  |
|                        | TCF4                  |
|                        | TCFL5                 |
|                        | TFAP4                 |
|                        | TFEB                  |
|                        | TFEC                  |
|                        | TFE3                  |
|                        | USF1/2                |

**Supplementary Table 2.** Transepidermal water loss measurements were performed under the same room temperature and humidity conditions during the study. There is no statistical difference in room conditions between clinical visits conducted for *KIF3A* controls and cases.

|             | rs11740584 median<br>reference x risk allele | rs11740584 p value | rs2299007 median<br>reference x risk allele | rs2299007 p value |
|-------------|----------------------------------------------|--------------------|---------------------------------------------|-------------------|
| Temperature | 22.60 x 22.90                                | 0.80               | 23.00 x 22.40                               | 0.22              |
| Humidity    | 42.50 x 47.85                                | 0.30               | 45.45 x 48.20                               | 0.68              |

**Supplementary Table 3.** Taqman gene expression primers/probes and PYRO-seq primers used in the study.

| ID                    | Catalog        | Sequence                                   |
|-----------------------|----------------|--------------------------------------------|
| rs11740584 Fwd        |                | 5'-AATTTGAGGAAGAAAGTTGATATAGG-3'           |
| rs11740584 Rev        |                | 5'-Biotin-AACTTACCCCTTCTTTTTTTCCTT-3'      |
| rs11740584 Seq        |                | 5'-AGGTATTTTTTAAATAGTTAATGAT-3'            |
| rs2299007 Fwd         |                | 5'-TGTTGGTGAAGTGGAGAGAT-3'                 |
| rs2299007 Rev         |                | 5'-Biotin-ACAATAACAACTTACATTCCTTCTAT-3'    |
| rs2299007 Seq         |                | 5'AAGTGGAGAGATGGT-3'                       |
| rs17690965            | C__11818506_20 | Proprietary to ThermoFisher                |
| <i>HPRT</i>           | Mm03024075_m1  | Proprietary to ThermoFisher                |
| <i>Kif3a</i>          | Mm00492876_m1  | Proprietary to ThermoFisher                |
| <i>IL4</i>            | Mm00445259_m1  | Proprietary to ThermoFisher                |
| <i>IL13</i>           | Mm00434204_m1  | Proprietary to ThermoFisher                |
| <i>Irf4</i>           | Mm00516431_m1  | Proprietary to ThermoFisher                |
| <i>Wnt7a</i>          | Mm00437356_m1  | Proprietary to ThermoFisher                |
| <i>Knq2</i>           | Mm01343599_m1  | Proprietary to ThermoFisher                |
| <i>Inhba</i>          | Mm00434339_m1  | Proprietary to ThermoFisher                |
| <i>Ntkr2</i>          | Mm00435422_m1  | Proprietary to ThermoFisher                |
| <i>Igfals</i>         | Mm01962637_s1  | Proprietary to ThermoFisher                |
| rs11740584 CpGA,B Fwd |                | 5'-ATTTTAAATTATTTTGGTTAGGTAAGGT-3'         |
| rs11740584 CpGA,B Rev |                | 5'-Biotin-CCAAATAATCTCAAACCTCTTAACC-3'     |
| rs11740584 CpGA,B Seq |                | 5'-GGTTAGGTAAGGTGG-3'                      |
| rs11740584 CpGC Fwd   |                | 5'-Biotin-AAATTTAGGTTTTTAATATAGATGTAAGT-3' |



|                      |  |                                           |
|----------------------|--|-------------------------------------------|
| rs11740584 CpGC Rev  |  | 5'-ACCATTTACCTAATTAACCTTACATT-3'          |
| rs11740584 CpGC Seq  |  | 5'-ACATTTTTCTCCTATATTAATCC-3'             |
| rs2299007 CpGA Fwd   |  | 5'-AAGGTTAATGAAGAATTTTAAAGATATA-3'        |
| rs2299007 CpGA Rev   |  | 5'-Biotin-ACTTAAATCCTTAATTAACAATAACTCC-3' |
| rs2299007 CpGA Seq   |  | 5'-AGAATTTTAAAGATATAAGTTTTT-3'            |
| rs2299007 CpGB,C Fwd |  | 5'-AGGAGTTATTGTTAATTAAGGATTTAAGTA-3'      |
| rs2299007 CpGB,C Rev |  | 5'-Biotin-TATTCAATTCAAAAATTTAATTCCTATT-3' |
| rs2299007 CpGB,C Seq |  | 5'-AAAAGGGAAGGTATATATAG-3'                |
